# Supplementary material for: Synthesis and Characterization of Covalently Crosslinked pH-Responsive Hyaluronic Acid Nanogels: Effect of Synthesis Parameters
Source: MDPI journal article supplement (doi:10.3390/polym11040742), 2019-04-24
Supplement: s1 [file s1]

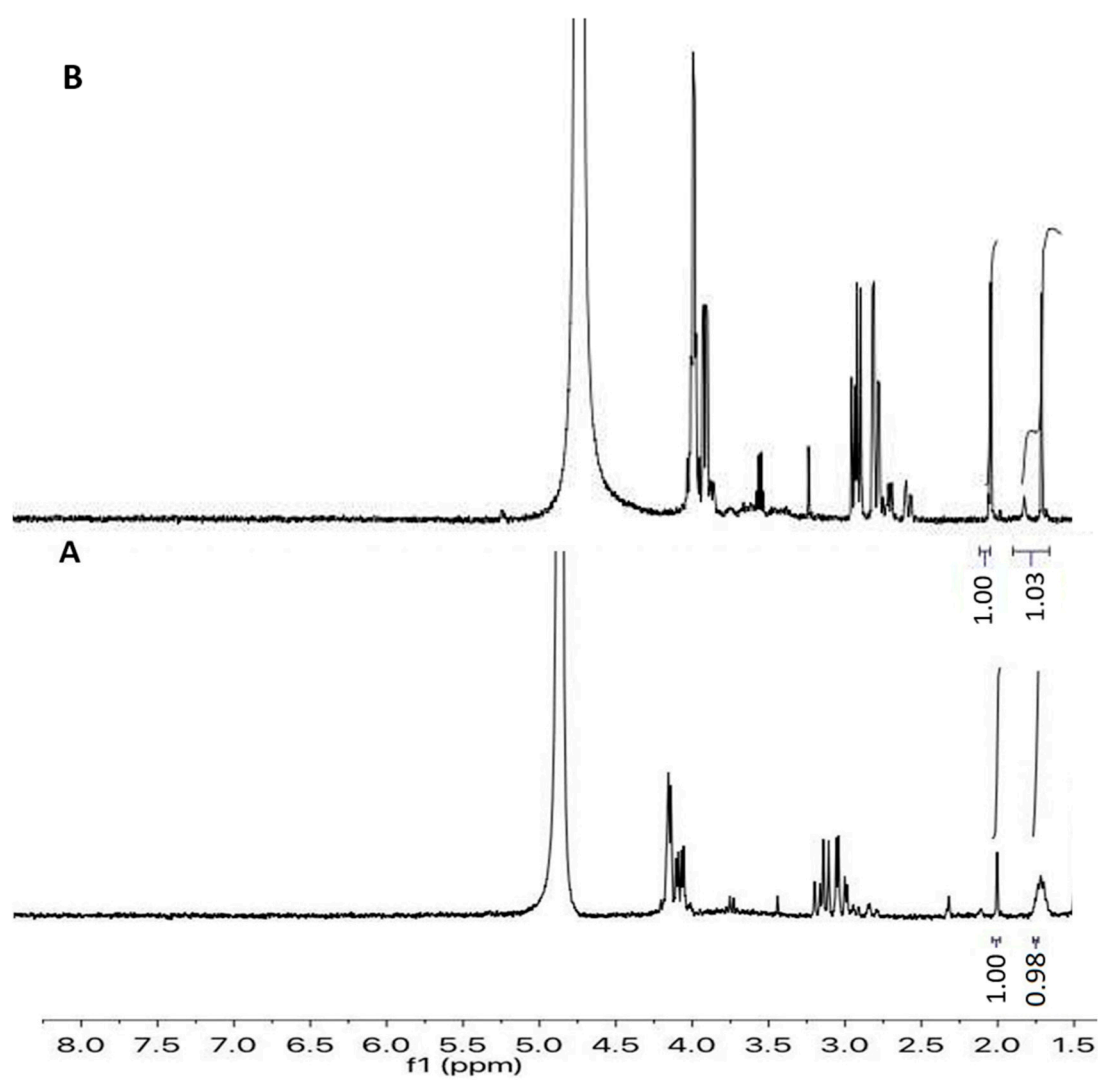

Figure S1.  $^1\text{H}$ -NMR spectra of (A) HA (HMW)-BDDE 1:1 and (B) HA (LMW) – BDDE 1:1

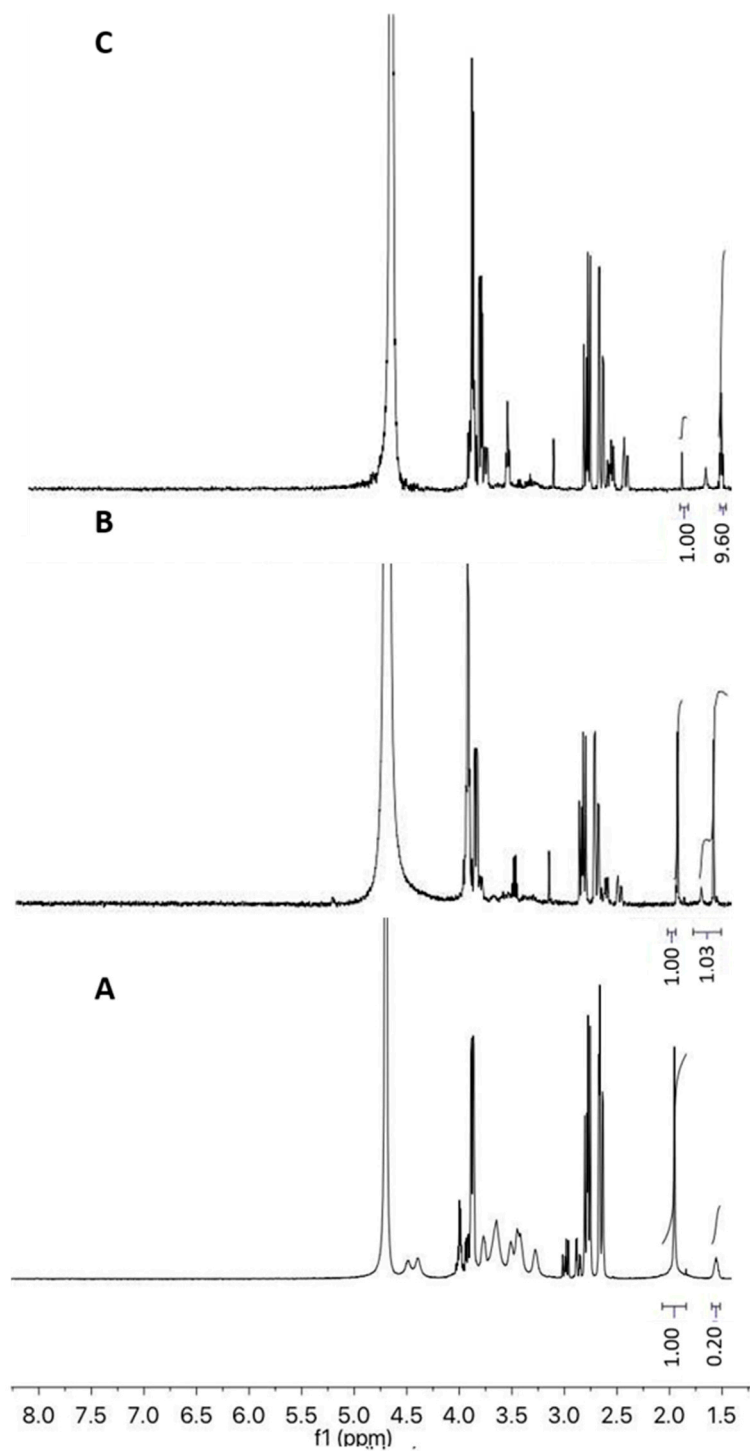

Figure S2.  $^1\text{H}$  NMR spectra of HA nanogels prepared by its crosslinking in microemulsion with HA (HMW) and BDDE in molar relation of (A) 1:0.2, (B) 1:1 and (C) 1:10

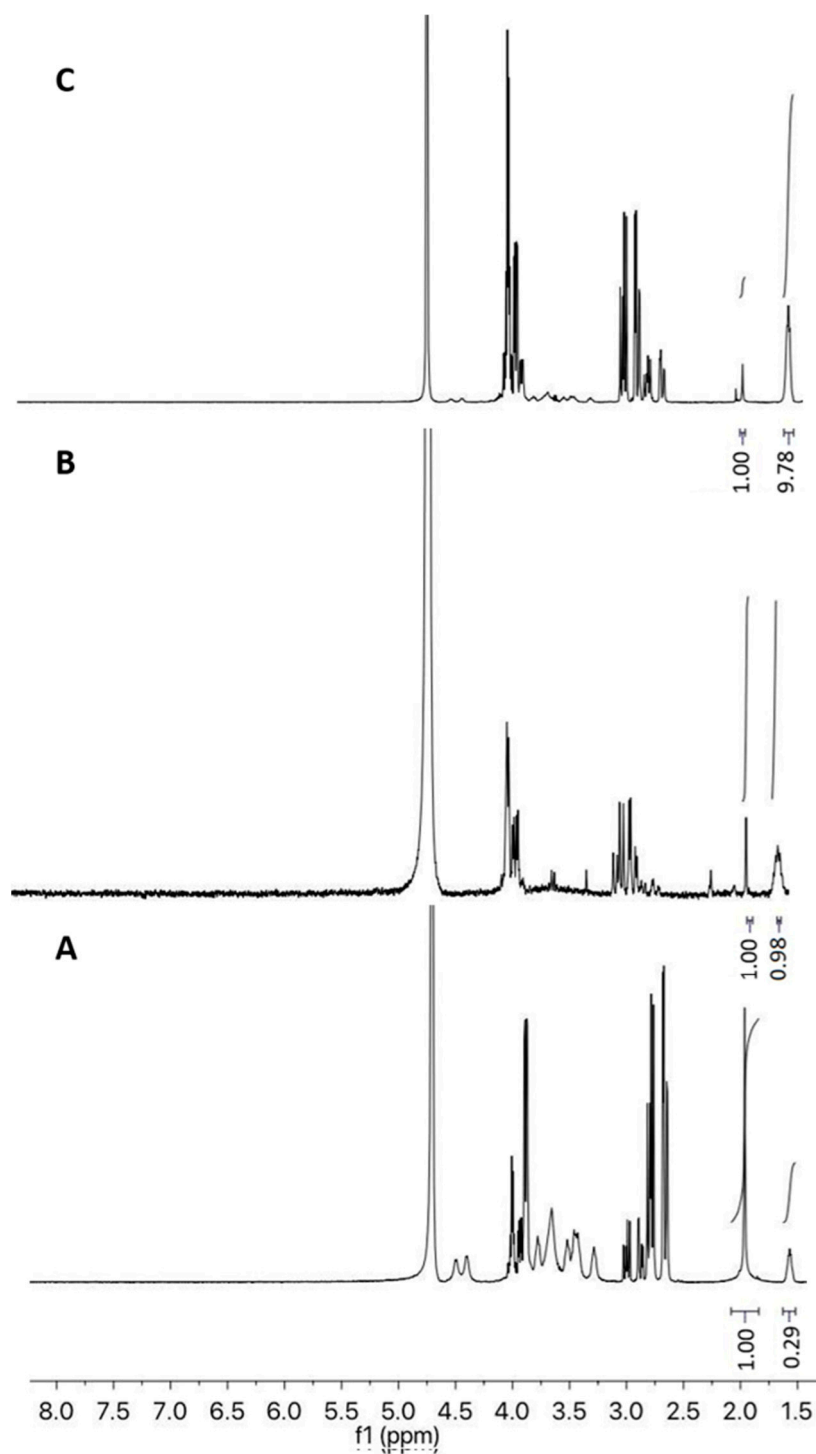

Figure S3.  $^1\text{H}$  NMR spectra of HA nanogels prepared by its crosslinking in microemulsion with HA (LMW) and BDDE in molar relation of (A) 1:0.2, (B) 1:1 and (C) 1:10
